# Supplementary material
Source: PubMed Central journal article supplement (PMC4467467)
Supplement: NIHMS688132-supplement-1.pdf [file NIHMS688132-supplement-1.pdf]

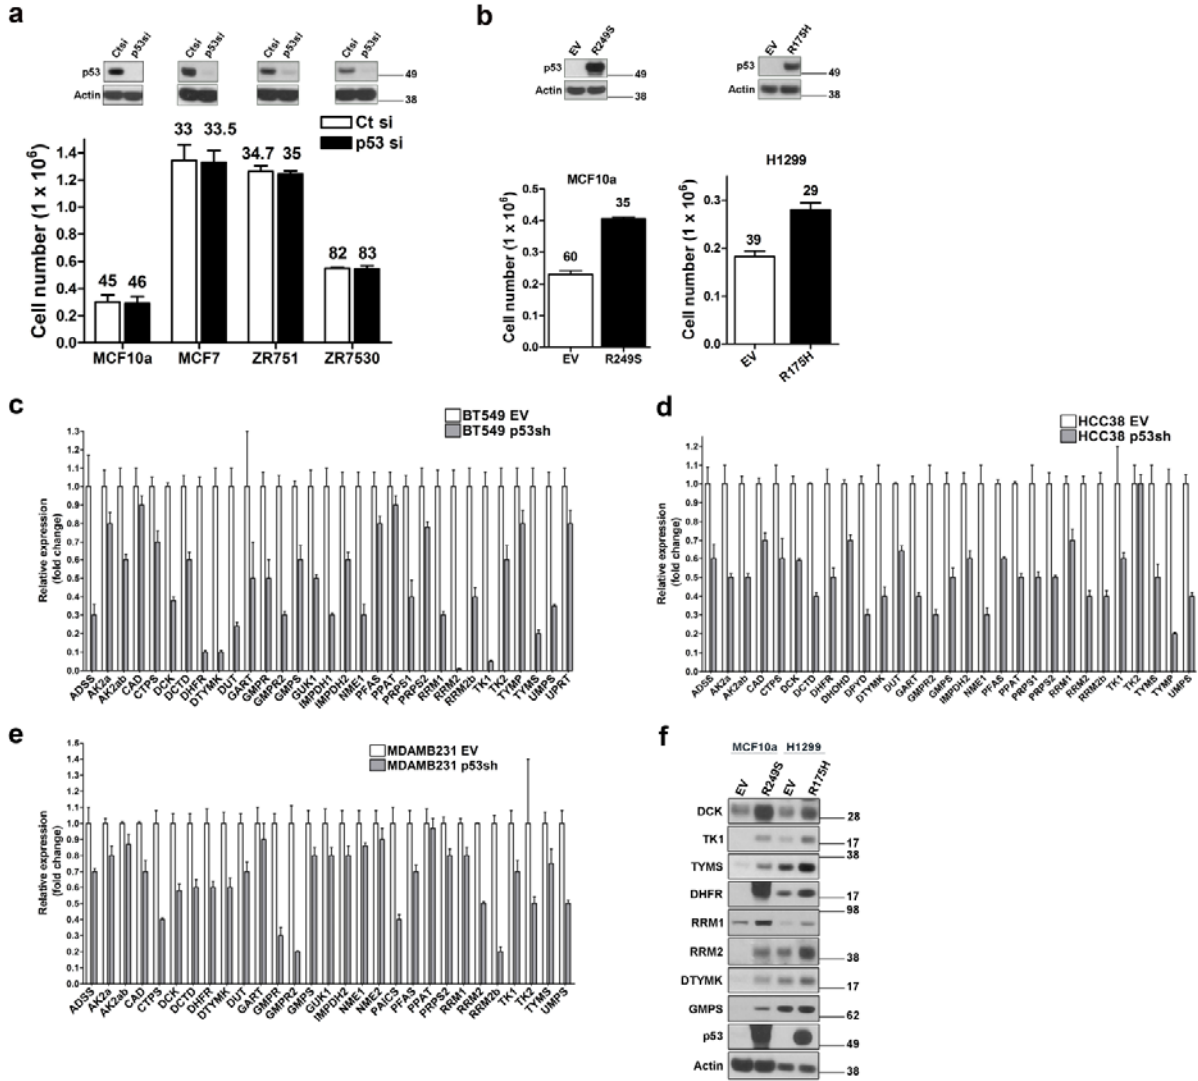

**g**

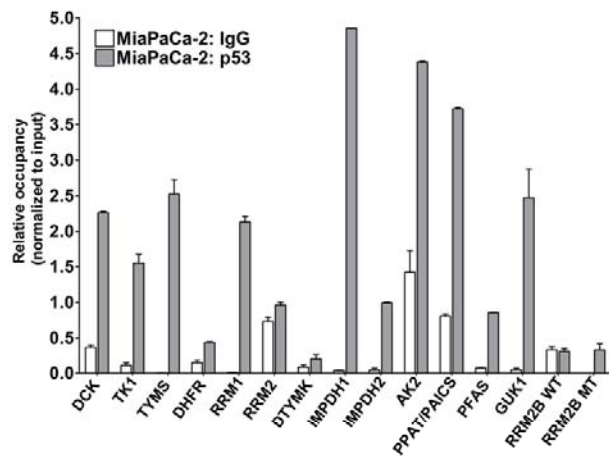

**h**

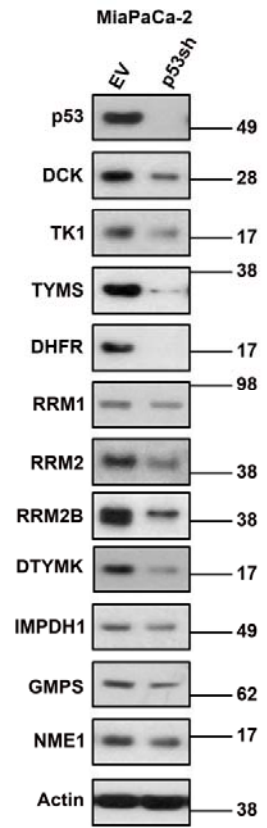

**i**

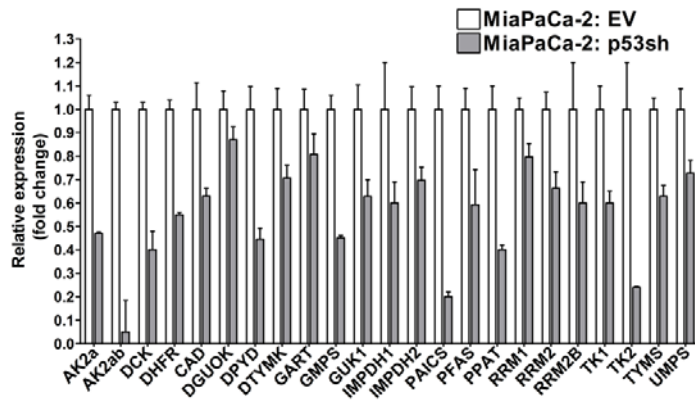

j

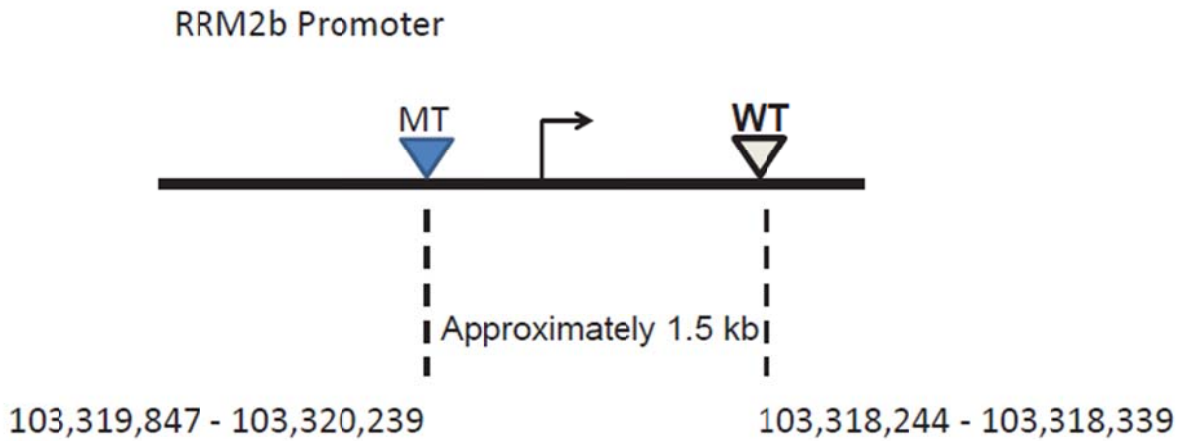

k

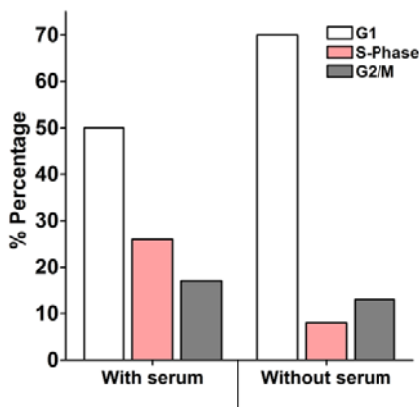

HCC38

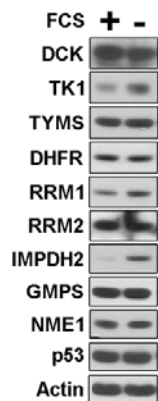

H1299 w/o FBS

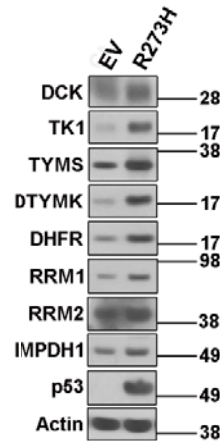

l

ZR751

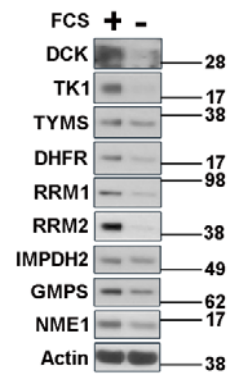

**Supplementary Figure 1 (Related to Figure 1). Mtp53 promotes cell proliferation by directly activating NMG.** (a) MCF10a, MCF7, ZR751 and ZR7530 cells were transfected with either a control (Ct) or p53 siRNA (p53si) and cell counts and doubling times were estimated after 72 hours. Error bars indicate mean  $\pm$ SD of three independent replicates. Inset is the western blot showing p53 knockdown. (b) MCF10a cells were infected with R249S p53 mutant, selected for 7 days. After selection cells were seeded and doubling times were estimated after 72 hours.

H1299 empty vector or R175H stable expressing cells were plated and cell counts and doubling times were determined after 72 hours. Error bars indicate mean  $\pm$ SD of three independent replicates. Insets are the western blots showing R249S and R175H p53 mutant stable expression.

(c) Cells were infected with an empty vector (EV) or p53 shRNA vector (p53sh) and harvested for real-time RT-PCR analysis. Shown is the data for BT549 (c), HCC38 (d), and MDAMB231 (e). Error bars indicate mean  $\pm$ SD of two independent replicates. (f) MCF10a cells were infected with either an empty vector (EV) or R249S p53 mutant (R249S), selected for 7 days and then processed for western blot analysis of the indicated proteins. H1299 cells either empty vector (EV) and R175H were plated and then processed for western blot analysis of the indicated proteins. (g) Chromatin immunoprecipitation was performed on the MiaPaCa-2 cells with either a control or p53 antibody. Show is real-time PCR analysis normalized to input DNA. Error bars indicate mean  $\pm$ SD of two independent replicates. (h) Western blot analysis of MiaPaCa-2 cells infected with either empty vector (EV) or p53 shRNA (p53sh). (i) Real-time RTPCR analysis of NMG expression was performed on MiaPaCa-2 cells infected with either an empty vector (PLKO) or p53 shRNA (p53sh). Error bars indicate mean  $\pm$ SD of two independent replicates. (j) Schematic representation of the RRM2b promoter showing the binding sites for mutant p53 (MT) and wildtype p53 (WT). The numbers below the schematic are the genomic coordinates of the binding sites on human chromosome 8 (HG18 build). (k) Cell cycle analysis of HCC38 in the presence or absence of serum for 24 hours. Western blot analysis of indicated genes prepared from cell cultures incubated with and without serum for 24 hours. H1299 empty vector and H1299: R175H cells were serum starved for 24 hours and then processed for western blot for indicated proteins. (l) ZR751 western blot analysis of indicated genes prepared from cell cultures incubated with and without serum for 24 hours.

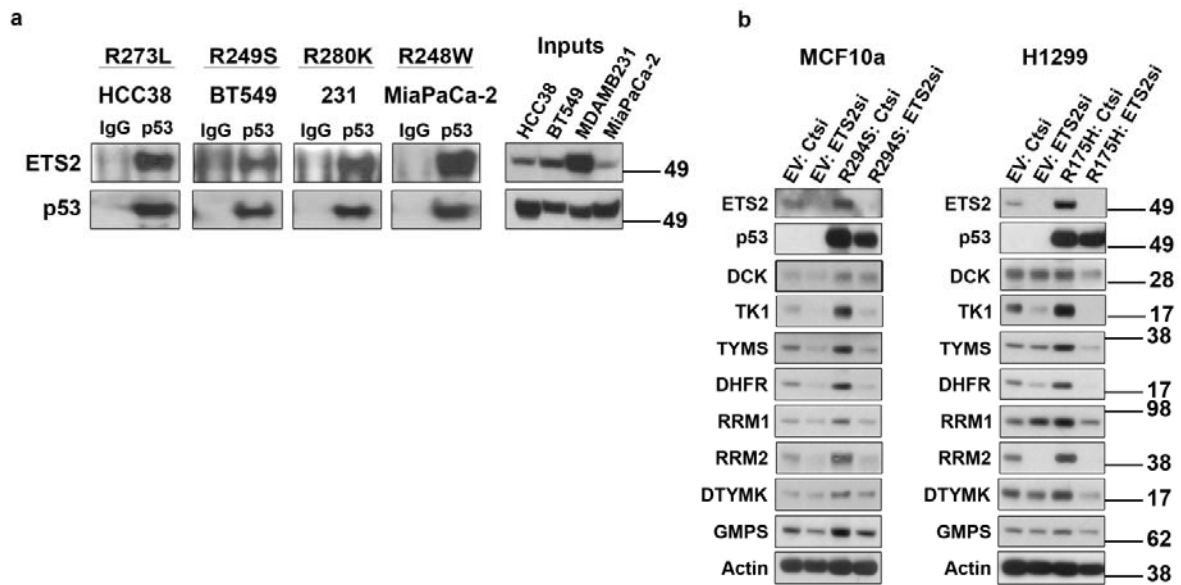

**Supplemental Figure 2 (Related to Figure 2). mtp53 associates with ETS2 to regulate NMG.** (a) HCC38, BT549, MDAMB231 were plated and lysates were prepared to immunoprecipitate p53 subsequently to determine if ETS2 interacts with various p53 mutants. (b) Stable mutant p53 expressing cells including MCF10a: R249S and H1299: R175H cells were transfected with either a control (Ct) or ETS2 siRNA (ETS2si) to determine the contribution of ETS2 in regulating nucleotide metabolism genes.

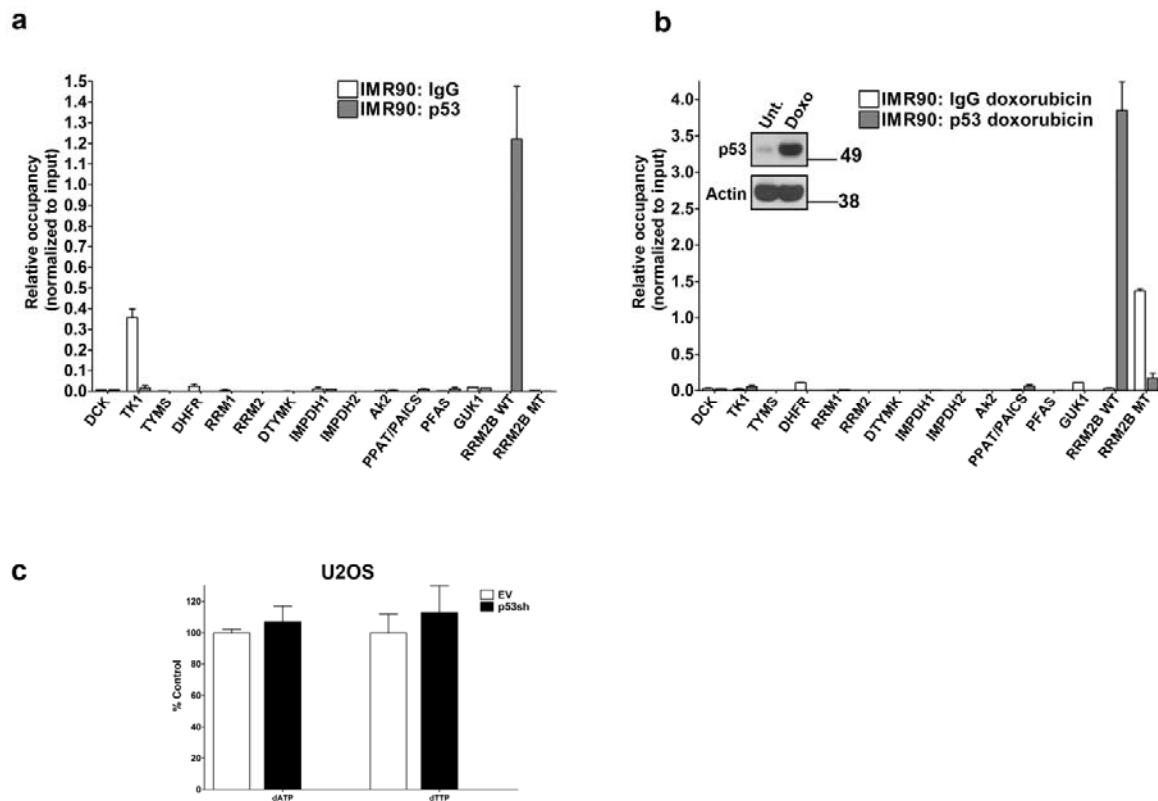

**Supplemental Figure 3 (Related to Figure 3). Wtp53 does not associate with mtp53 binding sites in promoters of NMG and does not control dATP or dTTP levels.** Chromatin immunoprecipitation was performed on IMR90 cells that were not treated (a) or treated with doxorubicin (b). Inset is a western blot to show p53 induction by doxorubicin. Real-time PCR was performed to detect the association of Wtp53 with the mtp53 binding regions and also its association with the Wtp53 binding site in the RRM2b promoter. Error bars indicate mean  $\pm$ SD of two independent replicates. (c) U2OS cells infected with either empty vector (EV) or p53 shRNA (p53sh) were processed to detect dATP and dTTP levels. Error bars indicate mean  $\pm$ SD of three replicates. Western blot analysis confirming the knockdown is shown in Figure 3A.

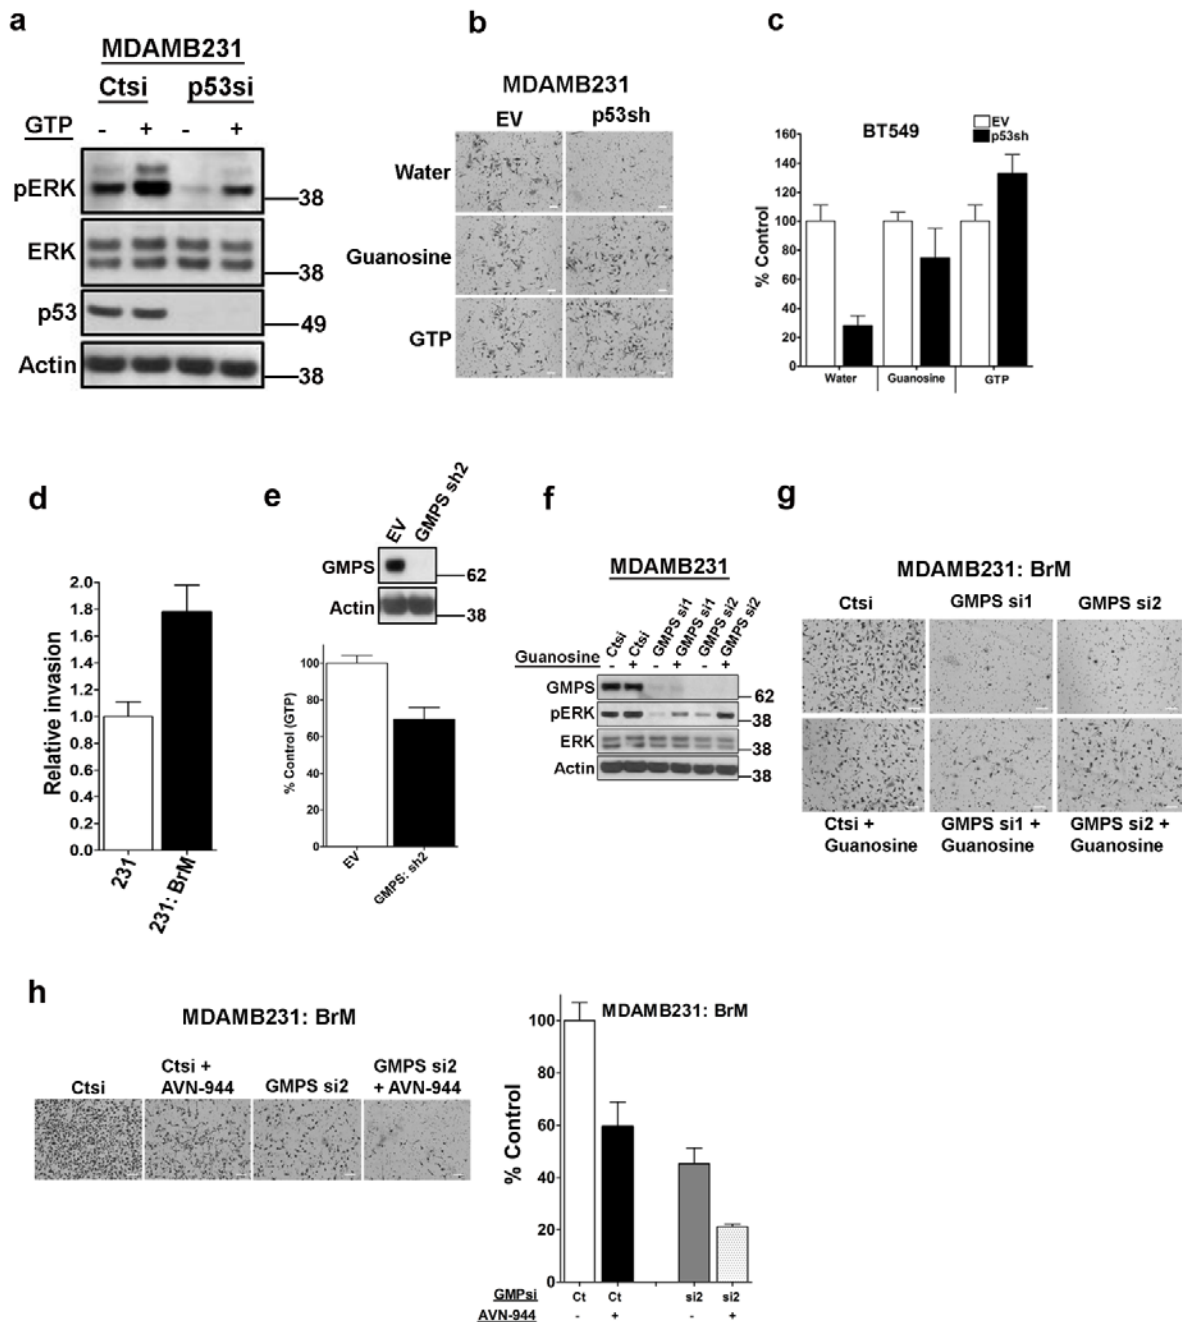

**Supplemental Figure 4 (Related to Figure 4). Control of cell invasion by guanosine and mutant p53.** (a) MDAMB231 cells were transfected with either control (Ct) or p53 siRNA (p53si) and then harvested for western blot analysis to detect phospho-ERK (related to Fig. 4b). (b) Invasion images of the Matrigel invasion assay (related Fig. 4d) which was performed on

MDAMB231 cells infected with either empty vector (EV) or p53 shRNA (p53sh); 100  $\mu$ M of exogenous guanosine or 1 mM of GTP was supplemented in the medium as indicated. Scale bars, 100  $\mu$ m. (c) BT549 cells infected with either an empty vector (EV) or p53 shRNA (p53sh) were analyzed for their invasive activity in a Matrigel invasion assay. 100  $\mu$ M of guanosine or 1 mM of GTP was added to the medium where indicated. Error bars indicate mean  $\pm$ SD of two independent replicates. (d) Comparison of invasive activity of parental 231 and 231-BrM. Error bars indicate mean  $\pm$ SD of two independent replicates. (e) Western blot analysis confirming the stable knockdown GMPS in 231: BrM which was used for in vivo studies. Western blot analysis of cells infected with either empty vector (EV) or GMPS shRNA (GMPS sh). Quantitation of GTP levels in cells infected with either empty vector (EV) or GMPS shRNA (GMPS sh). Error bars indicate mean  $\pm$ SD of two independent replicates. (f) MDAMB231 cells were transfected with either control (Ct) or GMPS siRNAs (GMPS si) and then harvested for western blot analysis to detect phospho-ERK. (g) Invasion images: Analysis of GMPS knockdown in 231-BrM invasive activity and rescue by supplementation of guanosine in the medium (related to Fig. 4f). Scale bars, 100  $\mu$ m. (h) Invasion images: 231: BrM cells were transfected with either a control (Ct) or GMPS siRNA2, treated with either DMSO or AVN-944 (1  $\mu$ M) for 12 hours prior to seeding for invasion assay as indicated. Scale bars, 100  $\mu$ m. Quantification of percentage inhibition of invasion after inhibiting IMPDH2 and GMPS together or alone. Error bars indicate mean  $\pm$ SD of two independent replicates.



**a**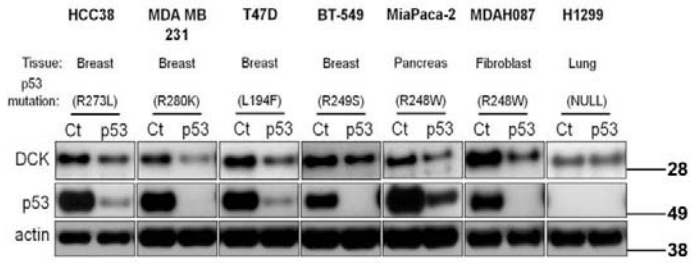**b**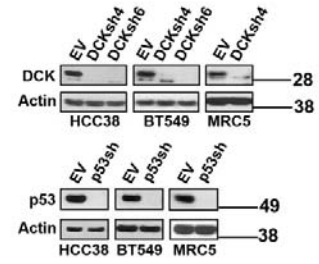**c**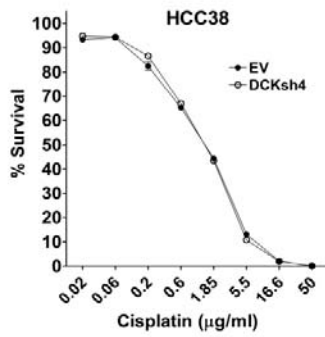**d**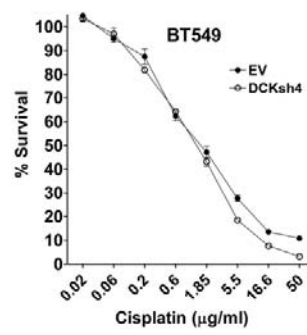**e**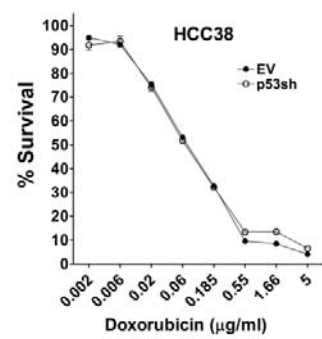

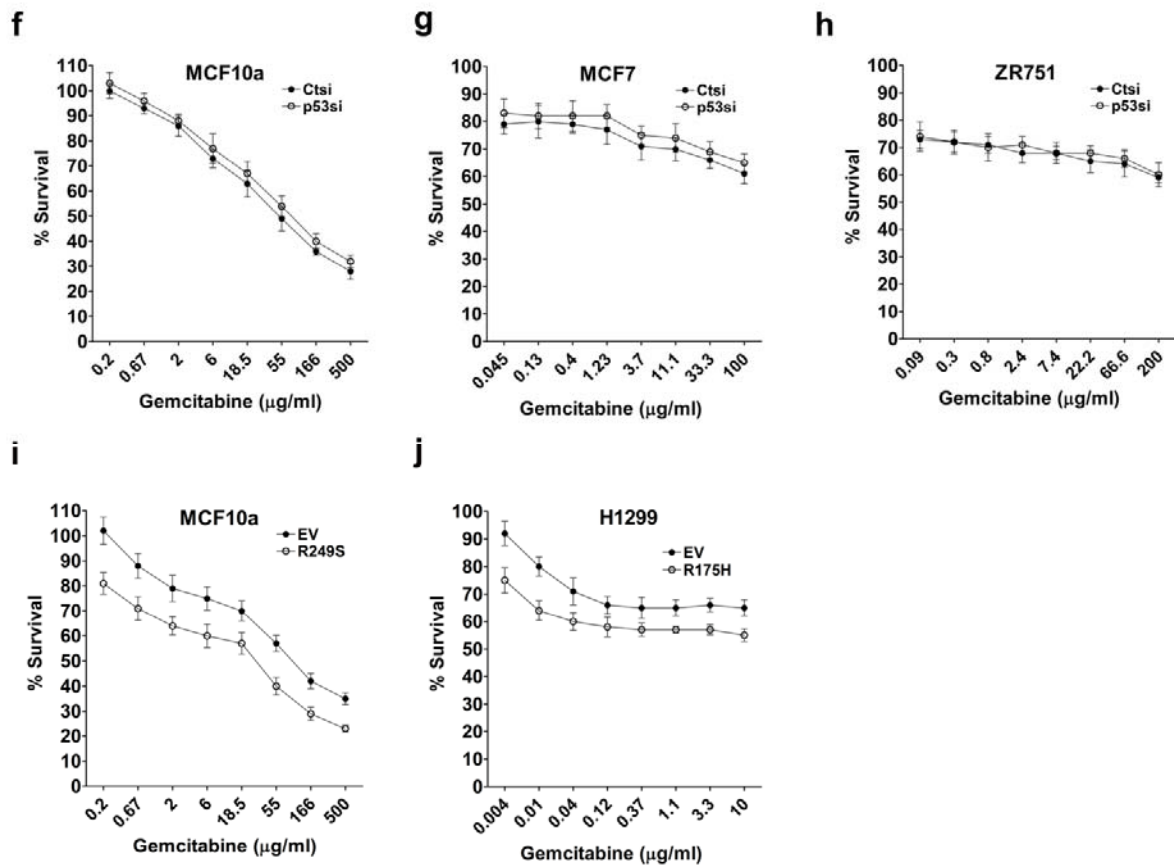

**Supplementary Figure 5 (Related to Figure 5). Role of dCK in response to cytotoxic agents.**

(a) A panel of mtp53 harboring cell lines (HCC38, MDAMB231, T47D, BT549, MiaPaCa-2, MDAH087) or p53 null (H1299) were transiently transfected with either a control (Ct) or p53 siRNA (p53si), and then harvested two days later for western blot analysis as indicated. (b) Western blot analysis of dCK knockdown (top) in HCC38, BT549, MRC5, and p53 (bottom) in HCC38, BT549, MRC5. MTT assay showing the response of HCC38 (c) or BT549 (d) cells infected with an empty vector (EV) or dCK shRNA (dCKsh) to treatment with cisplatin. (e) HCC38 cells infected with an empty vector (EV) or p53 shRNA (p53sh) were treated with doxorubicin for 72 hours and then processed for analysis by MTT assay. (f-h) MCF10a, MCF7 and ZR751 cells transfected with either a control (Ct) or p53 siRNA (p53si) were treated with

different doses of Gemcitabine and after 72 hours, analyzed by MTT assay. (i-j) MCF10a: R249S and H1299: R175H stable mtp53 expressing cells were treated with different doses of Gemcitabine and after 72 hours, analyzed by MTT assay. In all dose-response curves, error bars indicate mean  $\pm$ SD of three independent replicates.

**a**

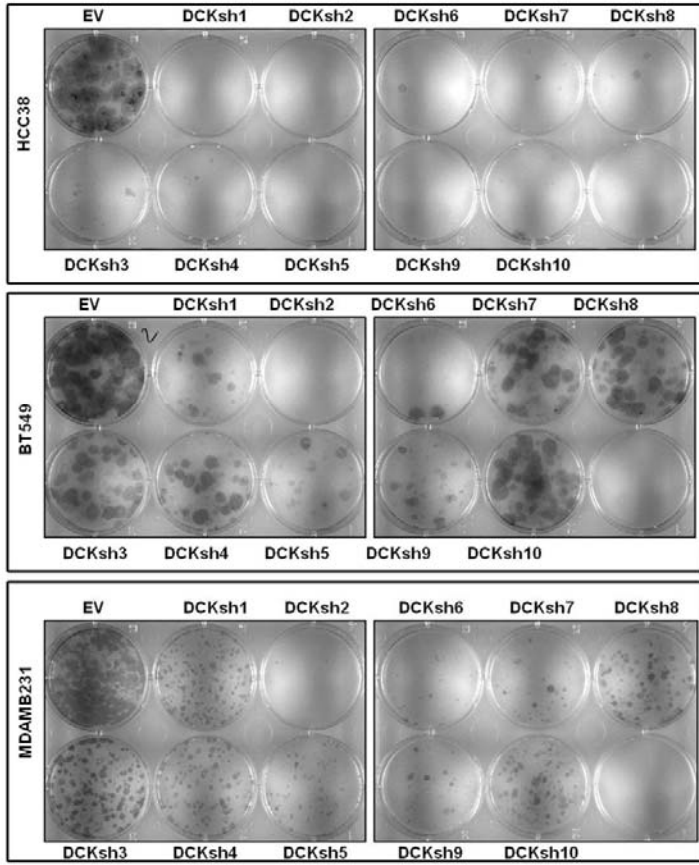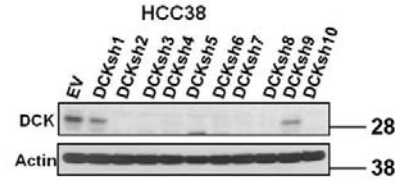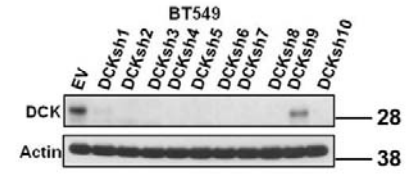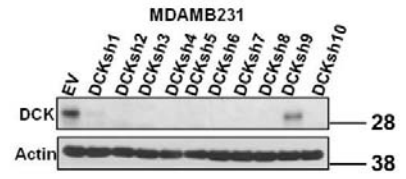

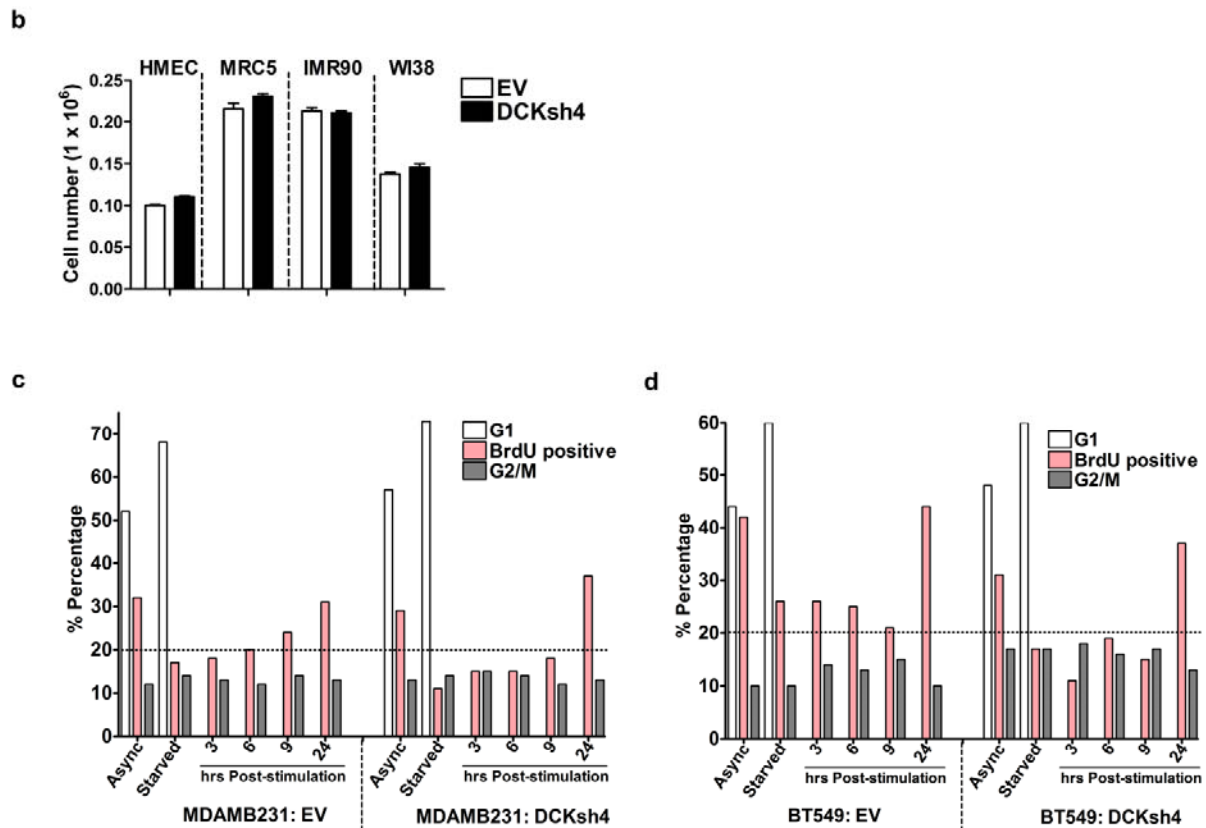

**Supplemental Figure 6 (Related to Figure 6). dCK knockdown reduces colony formation in *mtp53* expressing cells.** (a) Three breast cancer cell lines that harbor *mtp53* (HCC38, BT549, and MDAMB231) were infected with either an empty vector (EV) or 10 distinct shRNAs targeting dCK. After selection with puromycin for two days, 1000 cells/well were seeded and allowed to grow until for approximately two weeks. The dishes were then fixed and stained to visualize colonies. The right panel is a western blot analysis of dCK knockdown with the shRNAs used for the colony formation assay. (b) The normal cell strains HMEC, MRC5, IMR90 and WI38 were infected with either an empty vector (EV) or dCK shRNA (dCKsh4), selected with puromycin and then analyzed to determine cell doubling times. Error bars indicate mean  $\pm$ SD of three independent replicates. (c-d) MDAMB231 and BT549 cells were infected with an empty vector (EV) or dCK shRNA (dCKsh4) and selected for 3 days. The cells were then left in

serum containing medium (asynch), or serum starved overnight (starved). The cells were then stimulated to grow by the addition of medium supplemented with serum (hours post-stimulation). The cells were pulse labeled with BrdU for 1 hour prior to harvest at the indicated time points, and then processed to determine BrdU incorporation and cell cycle distribution by FACS analysis.

## Relapse Free Survival (RFS)

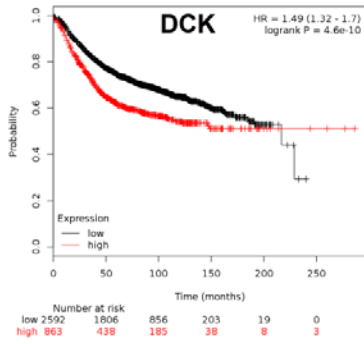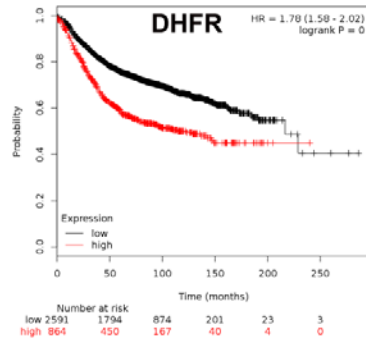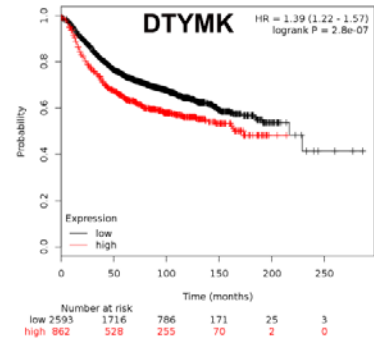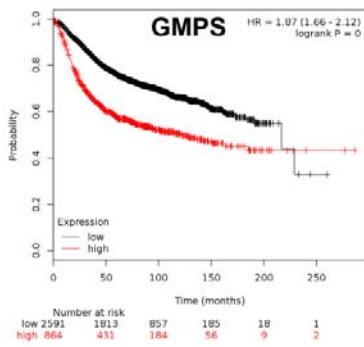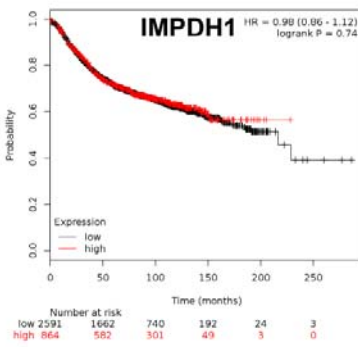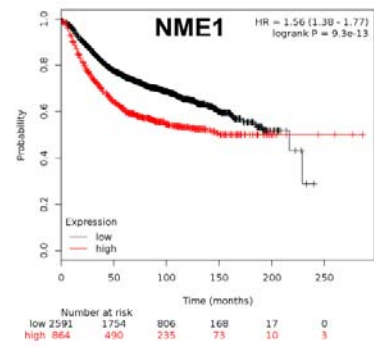

## Relapse Free Survival (RFS)

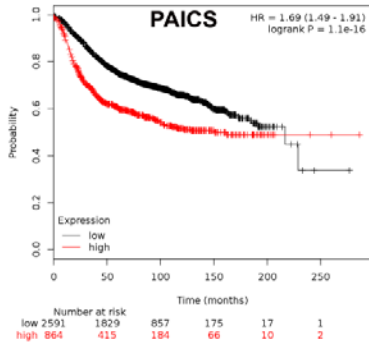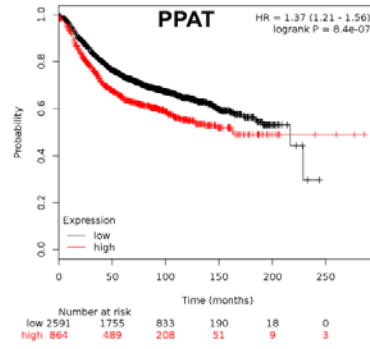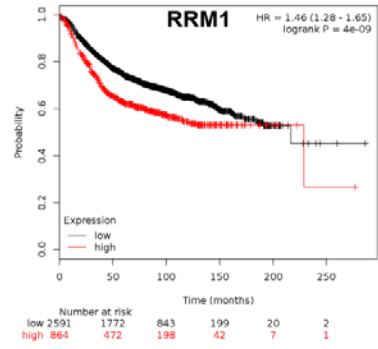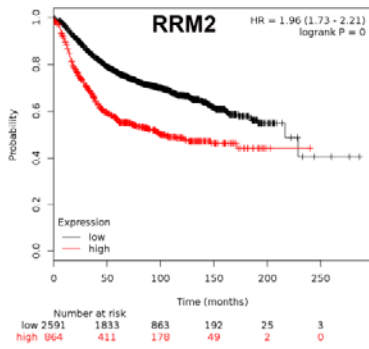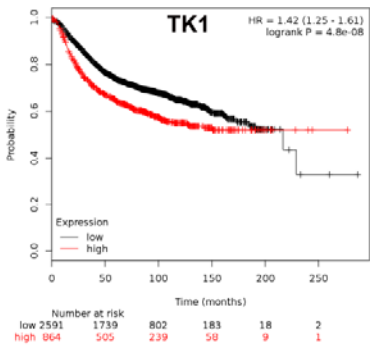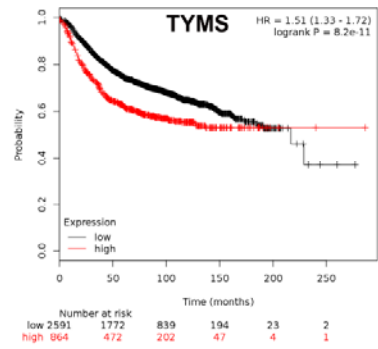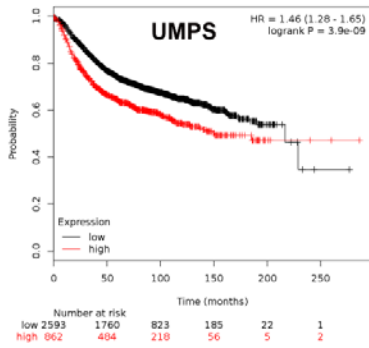



## Distant Metastasis Free Survival (DMFS)

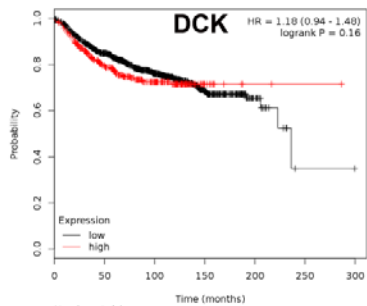

| Number at risk |      |     |     |     |     |     |     |
|----------------|------|-----|-----|-----|-----|-----|-----|
| Time (months)  | 0    | 50  | 100 | 150 | 200 | 250 | 300 |
| low            | 1207 | 898 | 469 | 153 | 25  | 1   | 0   |
| high           | 402  | 259 | 121 | 12  | 2   | 1   | 0   |

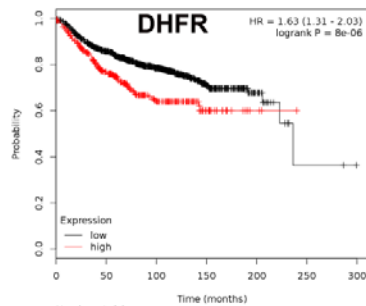

| Number at risk |      |     |     |     |     |     |     |
|----------------|------|-----|-----|-----|-----|-----|-----|
| Time (months)  | 0    | 50  | 100 | 150 | 200 | 250 | 300 |
| low            | 1209 | 909 | 486 | 144 | 24  | 2   | 0   |
| high           | 400  | 249 | 104 | 21  | 3   | 0   | 0   |

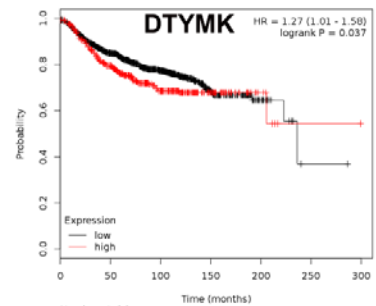

| Number at risk |      |     |     |     |     |     |     |
|----------------|------|-----|-----|-----|-----|-----|-----|
| Time (months)  | 0    | 50  | 100 | 150 | 200 | 250 | 300 |
| low            | 1207 | 883 | 452 | 116 | 20  | 1   | 0   |
| high           | 402  | 274 | 138 | 49  | 7   | 1   | 0   |

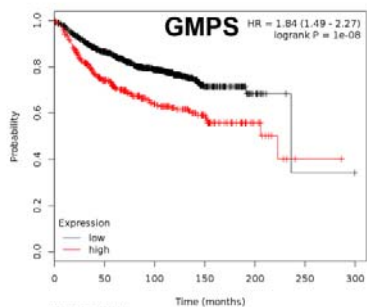

| Number at risk |      |     |     |     |     |     |     |
|----------------|------|-----|-----|-----|-----|-----|-----|
| Time (months)  | 0    | 50  | 100 | 150 | 200 | 250 | 300 |
| low            | 1208 | 918 | 466 | 109 | 14  | 1   | 0   |
| high           | 401  | 239 | 124 | 56  | 13  | 1   | 0   |

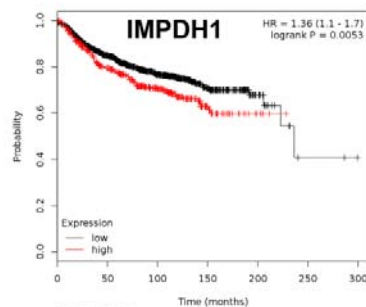

| Number at risk |      |     |     |     |     |     |     |
|----------------|------|-----|-----|-----|-----|-----|-----|
| Time (months)  | 0    | 50  | 100 | 150 | 200 | 250 | 300 |
| low            | 1208 | 884 | 432 | 125 | 21  | 2   | 0   |
| high           | 401  | 273 | 158 | 40  | 6   | 0   | 0   |

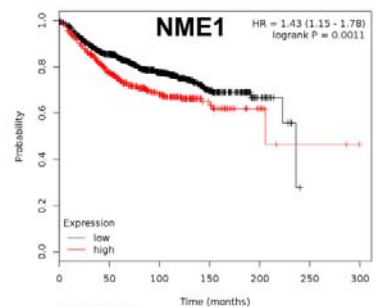

| Number at risk |      |     |     |     |     |     |     |
|----------------|------|-----|-----|-----|-----|-----|-----|
| Time (months)  | 0    | 50  | 100 | 150 | 200 | 250 | 300 |
| low            | 1207 | 894 | 450 | 122 | 19  | 0   | 0   |
| high           | 402  | 263 | 140 | 43  | 8   | 2   | 0   |

### Distant Metastasis Free Survival (DMFS)

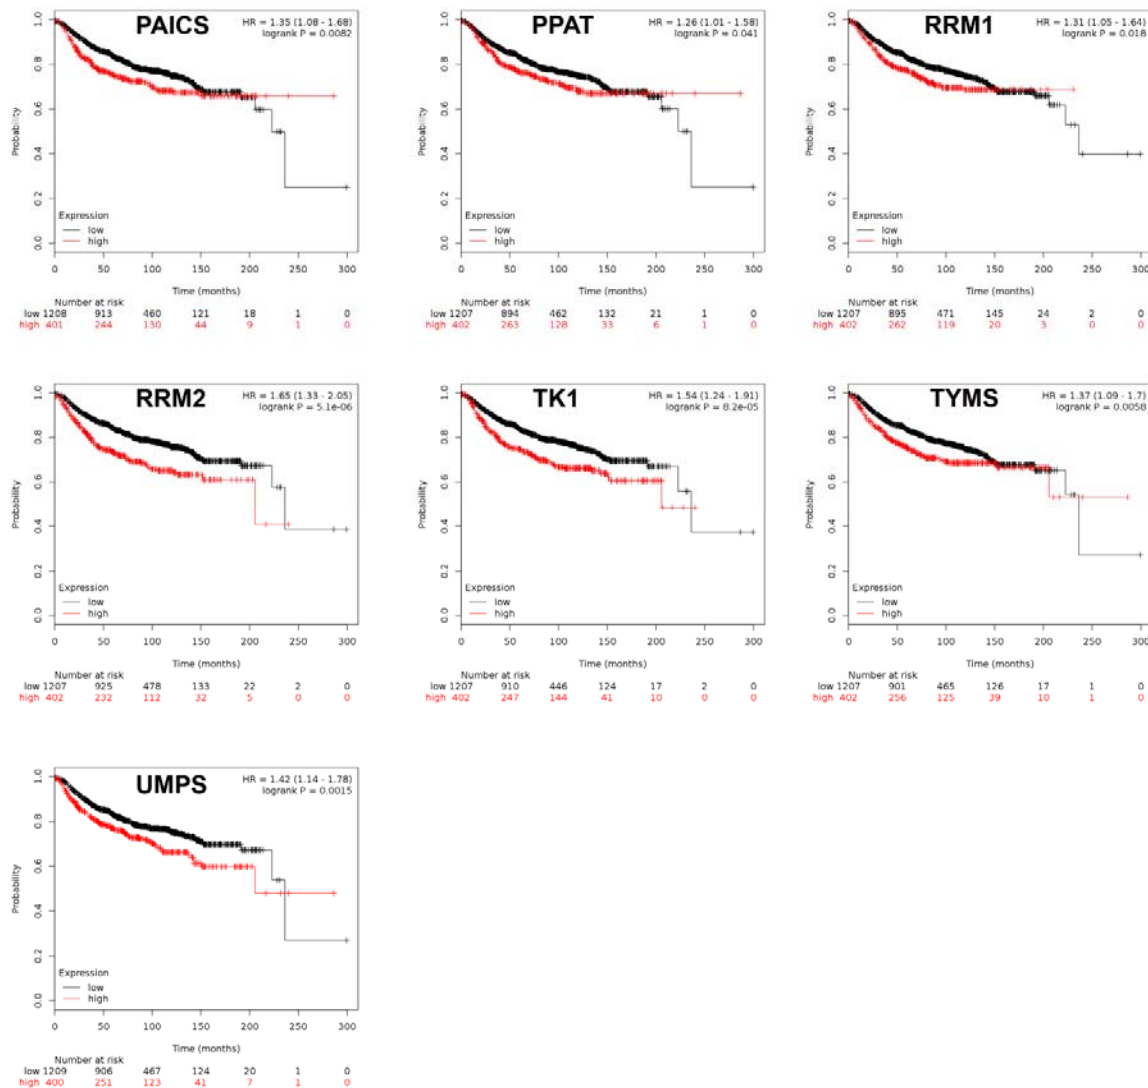

**Supplemental Figure 7 (Related to Figure 7). Kaplan-Meier curves of mtp53 target genes showing clinical outcome in terms of RFS and DMFS.** To study the relationship between the indicated mtp53 target genes and relapse free survival (RFS) (a-b) and distant metastasis free survival (DMFS) (c-d), we performed Kaplan-Meier analysis using a dataset of 4142 breast cancer transcriptomes with clinical outcome data<sup>76</sup>. Kaplan-Meier curves were constructed by dividing the patient cohort between samples in the upper quartile of expression for each

particular gene and the rest of the samples. Analysis was performed using the Kaplan-Meier Plotter software (kmplot.com) using the default parameters. Results are expressed as a hazard ratio with 95% confidence intervals and log rank test *P* value. *P* values of <0.05 were considered statistically significant.

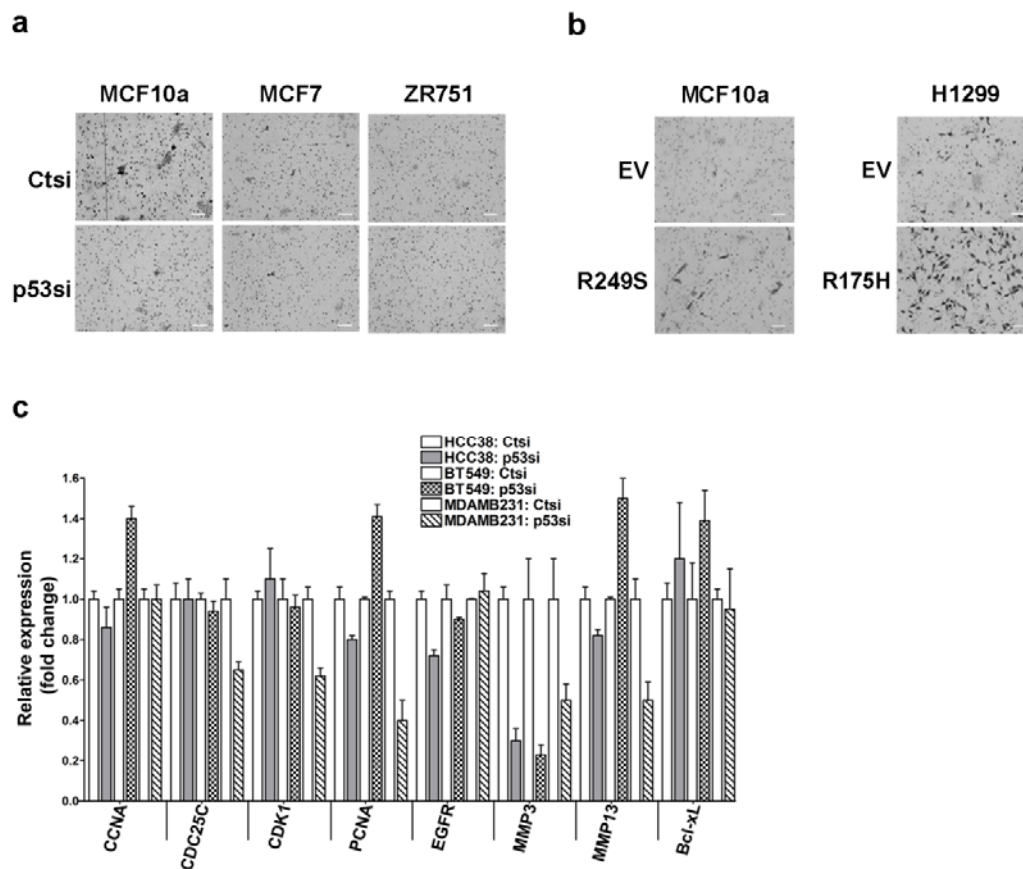

**Supplemental Figure 8. mtp53 promotes invasion.** (a) Invasion images: MCF10a, MCF7 and ZR751 cells were transfected with either Control (Ct) or p53 siRNA (p53si) and then performed Matrigel invasion assay. Scale bars, 100  $\mu$ m. (b) Invasion images of MCF10a cells infected with either an empty vector (EV) or R249S p53 mutant (R249S). Invasion images of H1299 cells infected with either an empty vector (EV) or R175H p53 mutant (R175H). Scale bars, 100  $\mu$ m. (c) HCC38, BT549 and MDAMB231 cells were transfected with either a control (Ct) or p53 siRNA (p53si), harvested RNA and cDNA was prepared to quantify indicated genes by Real-time PCR. Error bars indicate mean  $\pm$ SD of three independent replicates.

Fig.1c

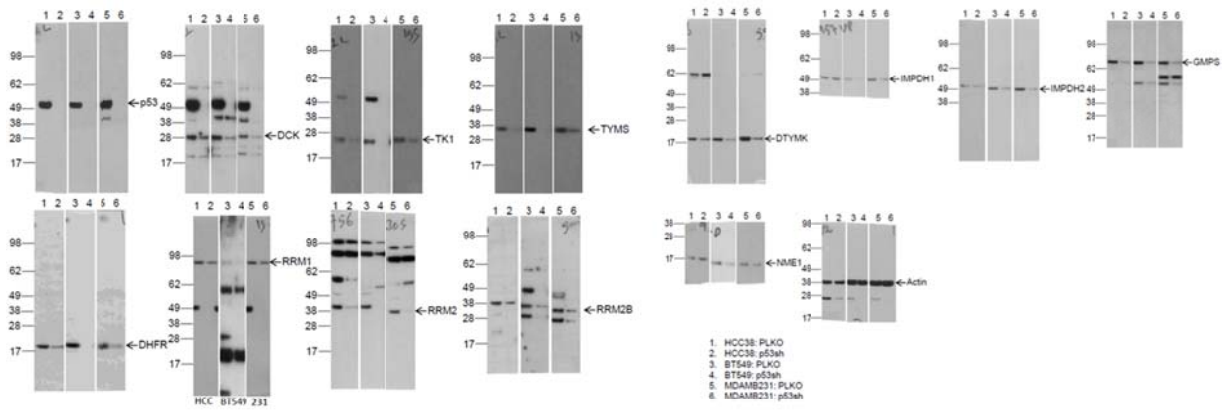

Fig.2a

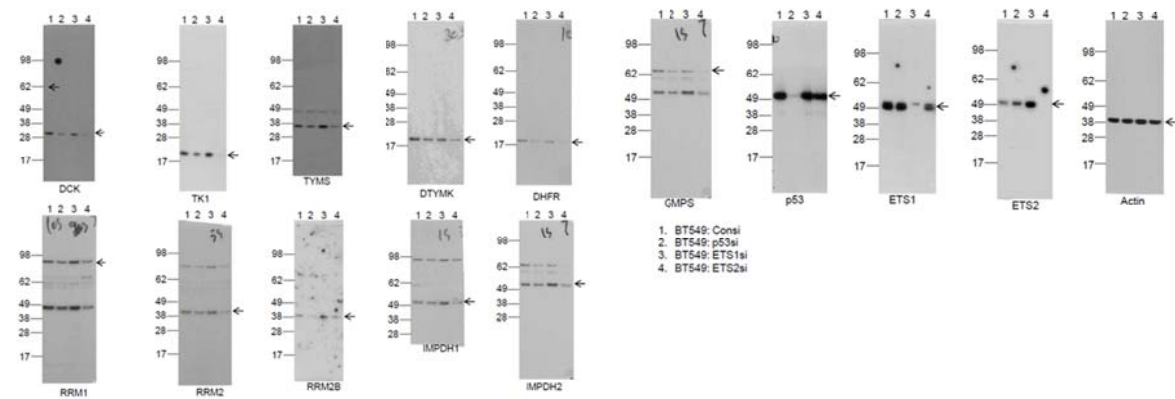

Fig.3a

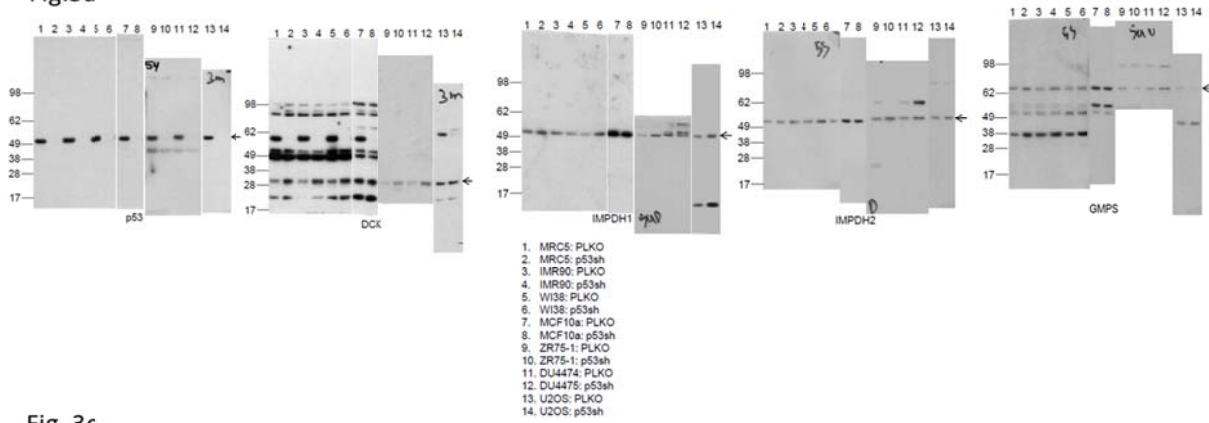

Fig. 3c

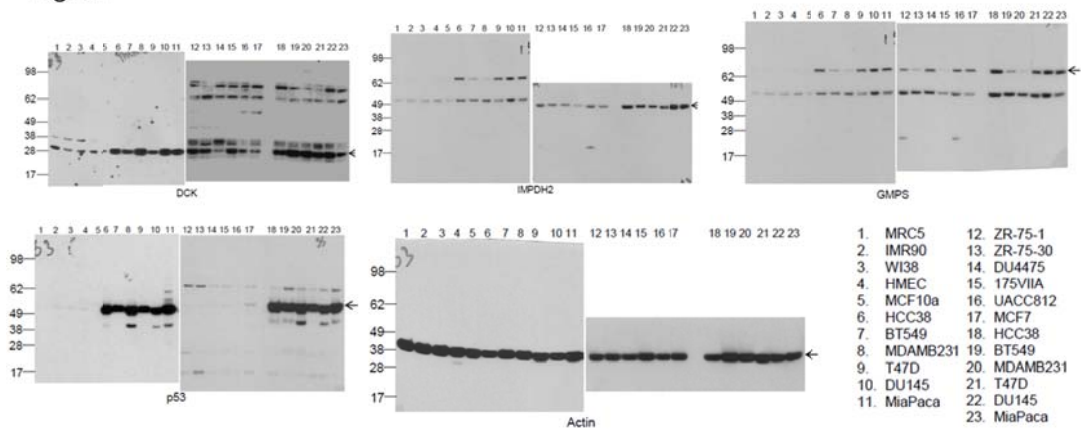

Fig. 4b

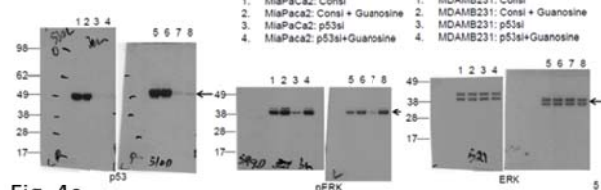

Fig. 4c

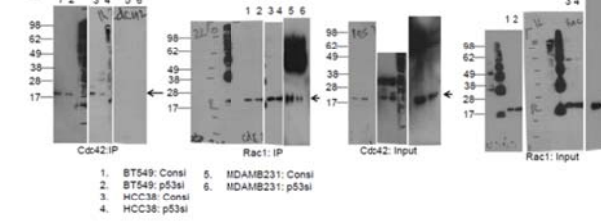

Fig. 4e

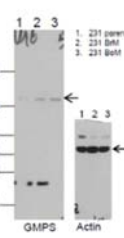

Fig. 4f

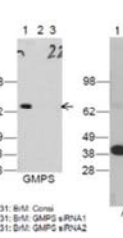

Fig. 6f

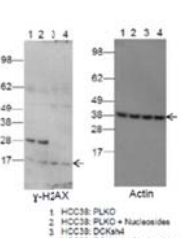

Supplementary Fig. 1f

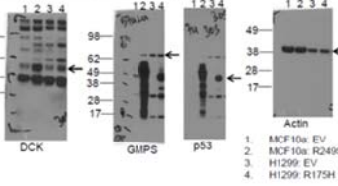

Supplementary Fig. 1h

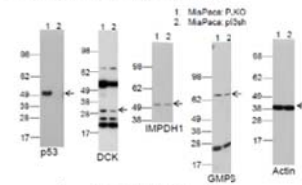

Supplementary Fig. 2a

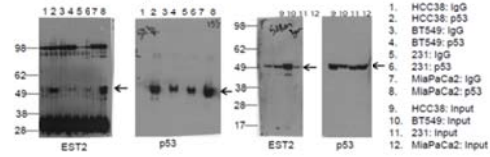

Supplementary Fig. 4e

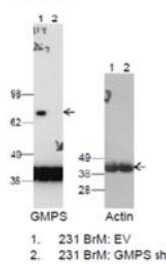

Supplementary Fig. 4f

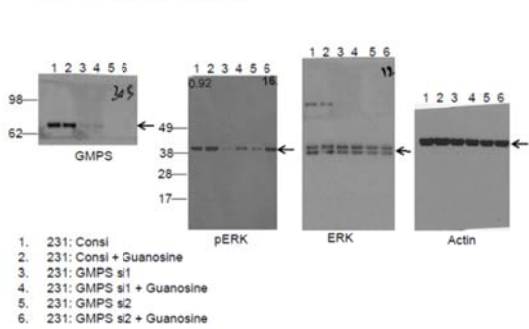

Supplemental Figure 9. The most important uncropped scanned full western blots.

**Supplementary Table 1: IC50 values for gemcitabine on mtp53 and wildtype p53**

| <b>Mtp53 cancer cell line</b> | <b>Gemcitabine: IC50 (µg/ml)</b> | <b>WTp53 cancer cell line</b> | <b>Gemcitabine: IC50 (µg/ml)</b> |
|-------------------------------|----------------------------------|-------------------------------|----------------------------------|
| HCC38                         | 0.003 (±0.0002)                  | ZR751 (breast)                | >20 (NA)                         |
| BT549                         | 0.01(±0.001)                     | ZR7530 (breast)               | >20 (NA)                         |
| MiaPaCa-2                     | 0.1 (±0.031)                     | MBAMD175V11A (breast)         | >20 (NA)                         |
|                               |                                  | UACC893 (breast)              | 3 (±0.6)                         |
|                               |                                  | A549 (lung)                   | 3 (±1)                           |
|                               |                                  | U2OS (osteosarcoma)           | >200                             |

\*IC50 was derived from three independent experiments.

\*Values in parentheses represent standard deviation calculated from three independent experiments.

**Supplementary Table 2: Resistant factor values**

| <b>Cell line</b> | <b>Gemcitabine (IC50: µg/ml)</b> | <b>Resistant factor</b> |
|------------------|----------------------------------|-------------------------|
| HCC38: EV        | 0.003 (±0.0002)                  |                         |
| HCC38: DKCsh4    | 0.07 (±0.015)                    | 23                      |
| HCC38: DCKsh6    | 0.007 (±0.0001)                  | 2.3                     |
| BT549: EV        | 0.01 (±0.001)                    |                         |
| BT549: DKCsh4    | 6 (±1.8)                         | 600                     |
| BT549: DCKsh6    | 6.4 (±2)                         | 640                     |
| MRC5: EV         | 700 (±21.3)                      |                         |
| MRC5: DKCsh4     | >1000 (NA)                       | >1.4                    |
| HCC38: EV        | 0.007 (±0.002)                   |                         |
| HCC38: p53sh     | >2 (NA)                          | >286                    |
| BT549: EV        | 0.08 (±0.02)                     |                         |
| BT549: p53sh     | 25 (±3.6)                        | 31                      |
| MRC5: EV         | >1000 (NA)                       |                         |
| MRC5: p53sh      | >1000 (NA)                       | NA                      |

\*IC50 was deduced from three independent experiments.

\*Values in parentheses represent standard deviation calculated from three independent experiments.



**Supplementary Table 3: NMG definitions**

| <b>Gene symbol</b> | <b>Definition</b>                                                                                                          |
|--------------------|----------------------------------------------------------------------------------------------------------------------------|
| ADSS               | Adenylosuccinate synthase                                                                                                  |
| AK2                | Adenylate kinase 2                                                                                                         |
| AK2ab              | Adenylate kinase isoenzyme 2 ab                                                                                            |
| CAD                | Carbonyl-phosphate synthetase 2, Aspartate transcarbonylase and dihydroorotase                                             |
| CTPS               | Cytidine triphosphate synthetase                                                                                           |
| DCK                | Deoxycytidine kinase                                                                                                       |
| DCTD               | Deoxycytidylate deaminase                                                                                                  |
| DGUOK              | Deoxyguanosine kinase                                                                                                      |
| DHFR               | Dihydrofolate reductase                                                                                                    |
| DHODH              | Dihydroorotate dehydrogenase                                                                                               |
| DPYD               | Dihydropyrimidine dehydrogenase                                                                                            |
| DTYMK              | Deoxythymidylate kinase                                                                                                    |
| DUT                | Dexoyuridine triphosphatase                                                                                                |
| GART               | Phosphoribosylglycinamide formyltransferase, phosphoribosylglycinamide synthetase, phosphoribosylaminoimidazole synthetase |
| GMPR               | Guanosine monophosphate reductase                                                                                          |
| GMPR2              | Guanosine monophosphate reductase 2                                                                                        |
| GMPS               | Guanosine monophosphate synthase                                                                                           |
| GUK1               | Guanylate kinase 1                                                                                                         |
| IMPDH1             | Inosine monophosphate dehydrogenase 1                                                                                      |
| IMPDH2             | Inosine monophosphate dehydrogenase 2                                                                                      |
| NME1               | NME/NM23 nucleoside diphosphate kinase 1                                                                                   |
| NME2               | NME/NM23 nucleoside diphosphate kinase 2                                                                                   |
| PAICS              | Phosphoribosylaminoimidazole carboxylase, phosphoribosylaminoimidazole succinocarboxamide synthetase                       |
| PFAS               | Phosphoribosylformylglycinamide synthase                                                                                   |
| PPAT               | Phosphoribosyl pyrophosphate amidotransferase                                                                              |
| PRPS1              | Phosphoribosyl pyrophosphate synthetase 1                                                                                  |
| PRPS1              | Phosphoribosyl pyrophosphate synthetase 2                                                                                  |
| RRM1               | Ribonucleotide reductase M1                                                                                                |
| RRM2               | Ribonucleotide reductase M2                                                                                                |
| RRM2b              | Ribonucleotide reductase M2 B                                                                                              |
| TK1                | Thymidine kinase 1                                                                                                         |
| TK2                | Thymidine kinase 1                                                                                                         |
| TYMP               | Thymidine phosphorylase                                                                                                    |
| TYMS               | Thymidylate synthetase                                                                                                     |
| UMPS               | Uridine monophosphate synthetase                                                                                           |
| UPRT               | Uracil phosphoribosyl transferase                                                                                          |

## Supplementary Methods

### Western blotting

Western blot analysis was performed using DCK (Genetex: GTX107636; 1:2000), RRM2 (Genetex: GTX103193; 1:2000), RRM2B (Genetex: GTX109620; 1:2000), TK1 (Genetex: GTX62133; 1:2000), RRM1 (Cell signaling: 8637S; 1:3000), TYMS (Cell signaling: 9045P; 1:3000), NME1 (Cell Signaling: 3345S; 1:3000), PARP (Cell Signaling: 9542I; 1:3000), DTYMK (Protein Tech: 15360-1-AP; 1:3000), DHFR (Protein Tech:15194-1-AP; 1:3000), IMPDH1 (Protein Tech: 22092-1-AP; 1:3000), IMPDH2 (Abcam: Ab131158; 1:3000), GMPS (Santa Cruz: sc-376163; 1:3000), p53 (Santa Cruz: sc-126; 1:3000), ETS1 (Santa Cruz: sc-5558;1:500), ETS2 (Santa Cruz: sc-365666; 1:200), gamma H2A.X (Bethyl: A300-081A; 1:2000), c-Myc (Santa Cruz: 9E10; 1:1000) and actin HRP (Sigma: A3854; 1:40000) antibodies.

### siRNA

GMPS#1: HSC.RNAL.N003875.12.1 (Integrated DNA Technologies)  
GMPS#2: HSC.RNAL.N003875.12.2 (Integrated DNA Technologies)  
ETS1 #5: CAGCTTCGACTCAGAGGACTA (Qiagen)  
ETS1 #6: CACGACCTAAGTTGAAGAGTT (Qiagen)  
ETS2 #1: CCCGGTCAAGTTGGTTTCAA (Qiagen)  
ETS2 #3: AGGGATTTATGTAGCAGCTAT (Qiagen)  
ETS2 #6: CTGTGATGAGTCAAGCCTTAA (Qiagen)  
p53 #7 CAGCATCTTATCCGAGTGGAA (Qiagen)

### shRNA

DCK: TRCN0000009932 (Dharmacon/GE Healthcare)  
TRCN0000009933 (Dharmacon/GE Healthcare)  
TRCN0000009934 (Dharmacon/GE Healthcare)  
TRCN0000009940 (Dharmacon/GE Healthcare)  
TRCN0000009941 (Dharmacon/GE Healthcare)  
TRCN0000194818 (Sigma-Aldrich)  
TRCN0000195182 (Sigma-Aldrich)  
TRCN0000196362 (Sigma-Aldrich)  
TRCN0000196616 (Sigma-Aldrich)  
TRCN0000196649 (Sigma-Aldrich)  
p53: shp53 pLKO.1 puro (Addgene #19119)  
GMPS: RHS4740-EG8833 (Thermo Scientific)  
Empty Vector pLKO.1 puro (Addgene #8453)

### shRNA resistant p53 expression vector

Silent mutations were introduced into the p53 coding sequence for the R280K or R249S, and then the cDNAs were cloned into the lentiviral vector pLVX-Hygromycin (Clontech) and lentiviruses were used to infect cell lines in which endogenous mutant p53 had been knocked down using shp53 pLKO.1. The cells were selected with hygromycin for one week.

### Real-Time RT-PCR primers

ADSS rt f TAC TGT TGG AGG TGT TTG TA  
ADSS rt r CCC CTT GTT TGT AAT AAT TC  
AK2a rt f AAGCCTACCACACTCAAAC  
AK2a rt r CTTGGACCCAACATTAGATA  
AK2ab rt f AATCACAGGAAGGCTGATT  
AK2ab rt r TACTCTATGAGTGGGGTGGT  
CAD rt f CGAAAGATGGGATATAAGAC  
CAD rt r TCAAAGTAGAGTCGATCACA  
CTPS rt f CCA CAG TGA AAG ACC ATC  
CTPS rt r CAA GCT TAC TCT CTT GAA GG  
DCK rt F GCCAGATGGTGCAATGTTC  
DCK rt R GCATCTTTGAGCTTGCCATT  
DCTD rt f AAC ATG AGT GAA GTT TCC TG  
DCTD rt r TTC TCT GTG CTG ATA AGA AG  
DGUOK rt f ATTACATGGCTTCATCTACC  
DGUOK rt r CTTCGTTGTCTTGTGAATAA  
DHRF rt f TCC CAG ACA GAA CCT ACT AT  
DHRF rt r CGA TTC TTC CAG TCT ACG  
DHODH rt f TATTATTGCTGAGTCATTGG  
DHODH rt r AGTAAAGAATGCAGGTCAAT  
DTYMK rt f CTA CTT GCA AAA GAA AAG TG  
DTYMK rt r GCT GTT TAC ACC AAT CTA GG  
DPYD rt f GTATGTCCAACCTCTGATCT  
DPYD rt r ATTGCTTTGAATACCTCAGT  
DUT rt f CTC TAT TGA CTG GGT AGA GG  
DUT rt r TAC TTC ACT GAG GGA AAA CT  
GART rt f CCTTTGGAATTTCTGCTTTA  
GART rt r CAGTGTGGTCACTGATTGAG  
GMPR rt f GCAATTCATAAGCATTACTC  
GMPR rt r GGCAAATAAACTTAACCTGT  
GMPR2 rt f GGTAGAAGAAGGAAGTGTAGC  
GMPR2 rt r CCTCTCTTCGCTTAAGTTG  
GMPS rt f GGTGGAGTAGACTCAACAGT  
GMPS rt r CATTGTAGAAAGAATGAGCA  
GUK1 rt f GGTATCATTAACGACAGC  
GUK1 rt r TTTGAGCTTTCTTGATTTCC  
IMPDH1 rt f CTAGATTGGACCTCGCTACA  
IMPDH1 rt r GATCCATCTGGACACCAAC  
IMPDH2 rt f CTCACCTACAATGACTTTCTC  
IMPDH2 rt r GGGTCTTAAGAGTGATTTTC  
NME1 rt f TGGACTACAGTGCTAAGATGCTG  
NME1 rt r CATCTGGTTTGATCGCAATG  
NME2 rt f CTGGGTCTATGAATAAGAGG  
NME2 rt r GGCAAATATGCTCTATAAAAG  
PFAS rt f CCAGTCCTTCACTTCTATGT

|             |                            |
|-------------|----------------------------|
| PFAS rt r   | TTGTAGCACAGTTCAGTCTC       |
| PPAT rt f   | TCATGGTATTGGTCTGTCTA       |
| PPAT rt r   | TTCCATAAGGATCTCGTACT       |
| PRPS1 rt f  | CCGCTTTGGGTAATTTAGA        |
| PRPS1 rt r  | AGATTTTGATATTCGGCATC       |
| PRPS2 rt f  | CAAGGTAGGAGAGAGTCGT        |
| PRPS2 rt r  | CAAATTATCCACAGGAATATC      |
| RRM1 rt f   | AGA AGA TTG CAA AGT ATG GT |
| RRM1 rt r   | GTA AGG TTC AAT GGA CTC AT |
| RRM2 rt f   | TAG AGG TGG TTC CTA CAA GT |
| RRM2 rt r   | GGG TGA CTG AAG TAT GAA CT |
| RRM2B rt f  | CTGGGTGCTGTCGTAGTT         |
| RRM2B rt r  | TGGCTCTTCATTTGACTTTA       |
| TK1 rt2 f   | CAATGAGCTGCATTAACCT        |
| TK1 rt2 r   | GTGTCTTTGGCATACTTGAT       |
| TK2 rt2 f   | ATTAATTAACCCTTCAGTCG       |
| TK2 rt2 r   | CAAGAGGAGAAATACTCGAA       |
| TYMP rt f   | TGG ATA AGC TGG AGT CTA TT |
| TYMP rt r   | CAT CTC TGG CTG CAT ATA G  |
| TYMS rt f   | CTA CAG CCT GAG AGA TGA AT |
| TYMS rt r   | GAA GAC AGC TCT TTA GCA TT |
| UMPS rt fl  | TTAGGAGGTCTAAGATTCCA       |
| UMPS rt rl  | TACCTCCCCTCTACTAATGA       |
| UPRT rt f   | GTCCTTCTGATGTATCCAAT       |
| UPRT rt r   | GGTTGAACTCCATGTTCTAT       |
| CCNA rt f   | GGTCTGTGTTCTGTGAATAA       |
| CCNA rt r   | GAAAATAAGAAATGCCTCT        |
| CDC25C rt f | AAGAAGGTTTTGTTTTTCTC       |
| CDC25C rt r | CATTTTCCTTTGATTAGACC       |
| CDK1 rt f   | AATAATAAGCCGGGATCTA        |
| CDK1 rt r   | GAATTGCAGTACTAGGAACC       |
| PCNA rt f   | TCGTTGTCTTTCTAGGTCTC       |
| PCNA rt r   | GAGGAAAGTCTAGCTGGTT        |
| EGFR rt f   | GTCTTGAAGGCTGTCCAA         |
| EGFR rt r   | CTTCTCCACTGGGTGTAAG        |
| MMP3 rt f   | AAAGTGACACACACTTTGAA       |
| MMP3 rt r   | ATACAGATTCACGCTCAAGT       |
| MMP13 rt f  | ATTTTACCAGACTTCACGAT       |
| MMP13 rt r  | GTTGTAGCCTTTGGAACTAC       |
| BCLXL rt f  | CCCTTCAGAATCTTATCTTG       |
| BCLXL rt r  | TGTAGGAGAGAAAGTCAACC       |

### Luciferase assays

The promoters were cloned into the PGL4 Luciferase reporter construct using the primers below. Genomic DNA from PC3 cells was initially amplified with the primers indicated as “out” and 1 microliter of this PCR was used as a template for PCR with the primers carrying restriction sites (in bold). Typically, 4-5 random bases were added on the 5’ end of the primer to permit optimal restriction enzyme binding and cleavage.

TK1 pro out f GCACTAGGCGCTCTGCAT  
TK1 pro out r ATGCCTGGACACAGGCTATC  
TK1 pro f KPN1 **ggtacc**ATGCCACAGGAGTGCTCTA  
TK1 pro r NHE1 **gctagc**CAGCACAGTGGGCAGGTTA  
RRM1 pro out f GCGGACGGCAGTGTTAGTAT  
RRM1 pro out r CCCTGTGCCTAAGACAGCTC  
RRM1 pro f xho **ctcgag**GAGACGCGCAGGTGAGAG  
RRM1 pro r HindIII **aagctt**GCGTACGCAGTCACTACTCG  
RRM2 pro out f AGCCTGGGTAGGGGCAAG  
RRM2 pro out r GATGTGAAAACGTGGCTGTC  
RRM2 pro f HindIII **aagctt** TAAAGGCTGCTGGAGTGAGG  
RRM2 pro r XhoI **ctcgag**GCCTAGGCGGGAAAGGAG  
TYMS out f CCAGCTTCAGTGCTCTCCTC  
TYMS out r CTCCTGACCTCAGGTGATCC  
TYMS pro f xho **ctcgag**AGCTCTCCCTAACCTCCAG  
TYMS pro r HindIII **aagctt**ATACCACTTGCTTCGGTTGC  
DTYMK out f ACACACACACGGACTTTCCA  
DTYMK out r CCATACCCCGCACTTAAAGA  
DTYMK pro f xho **ctcgag**TCAAACACAGCGTTTCCAGA  
DTYMK pro r HindIII **aagctt**GCCTATGTTCCCGGCTACC  
DHFR out f AGGCCTGCCATTAAAAACCT  
DHFR out r AAGTCTGGCCCCATCCTCT  
DHFR pro f HindIII **aagctt**CTTCCTCCTCCAGCCCTATC  
DHFR pro r XhoI **ctcgag**AAGTCTGGCCCCATCCTCT

Cell based luciferase assays were performed using the Promega dual luciferase assay kit according to the manufacturer’s protocol. Cells were plated the day before transfection and then transfected with a mix of siRNA, luciferase promoter construct and a Renilla luciferase construct. Two days later, the cells were harvested and processed to detect luciferase activity.

**CHIP primers:**

In most cases, primers were designed to amplify a PCR product ranging from 70-200 base pairs surrounding the predicted binding site for mutant p53 as determined after analysis of our previously reported CHIP-Seq data. If suitable primers could not be obtained, primers were designed to amplify a PCR product within 100-200 base pairs of the predicted binding site.

|                 |                       |
|-----------------|-----------------------|
| DCK ch f        | GCGTCTGTTCATCTCCAACA  |
| DCK ch r        | AAGAGGTTCCGGAGTCGG    |
| TYMS ch f       | GCTGTTTGAGATCTGTTTCC  |
| TYMS ch r       | TGCATTATAACCACTTGCTTC |
| DHFR ch f       | AACGGAAGTACTAAAACCTCA |
| DHFR ch r       | ATGATAGGGCTGGAGGAG    |
| RRM2 ch f       | TTCCATAATCAGCGTCTAA   |
| RRM2 ch r       | ATTACGTGGCCAGGAACTAA  |
| DTYMK ch f      | TAATCCAGGGCTACACAGAT  |
| DTYMK ch r      | ATGTGCCATATTGTCAGTTG  |
| PFAS ch f       | ACGGGGAAGTGAATGTATTT  |
| PFAS ch r       | TTGGTGGGGAGAGGTTTAT   |
| TK1 ch f        | AATGAGCTGCATTAACCTG   |
| TK1 ch r        | ACAGGCTATCACCACGAC    |
| RRM1 ch f       | GGTAGGCTTCACAGACTGAC  |
| RRM1 ch r       | AAAACATGGTAGCAGGAGAG  |
| IMPDH1 ch f     | CCTAGACTCGGTTTCGTCTCT |
| IMPDH1 ch r     | TTCTCTTCTGGTTTTTCCTC  |
| IMPDH2 ch f     | CCCCACTAATCAGGTAGTC   |
| IMPDH2 ch r     | AATCGGCTGGTTTATATTGG  |
| AK2 ch f        | CTTGACCTTGGAGTTCAGC   |
| AK2 ch r        | CCGAGTATCCTAAAGGCATC  |
| PPAT/PAICS ch f | AGGCTAAAGTTCATGGAAGC  |
| PPAT/PAICS ch r | CTCTCCGACCTAAGCCAGTA  |
| GUK1 ch f       | GGAAGAACGAGTGAGACAT   |
| GUK1 ch r       | CACTGAACCTACGTGACAGC  |
| RRM2b WT ch f   | GAATGCCTACTGCTAAACTT  |
| RRM2b WT ch r   | CACTGGTCTAATGAAGGATT  |
| RRM2b mt ch f   | TGAGGTAAATGTTGCTGTT   |
| RRM2b mt ch r   | GGCGAATAACATTTCTTA    |
